# Supplementary material
Source: PubMed Central journal article supplement (PMC4695306)

**Figure 7.** Cellular uptake of unmodified, DSPE-MPG H (10 nmol/mg), and Av-MPG H (5 mg/mL) NPs in the presence of uptake inhibitors, as determined by FACS. Mean fluorescence intensity of cells incubated with NPs only (negative control) for each treatment group was set as 100%. Error bars represent standard deviation.

**Figure 8.** Confocal microscopy of lysosome-NP colocalization in live HeLa cells. HeLa cells were incubated with 200  $\mu$ g/mL (A, B) DSPE-MPG H (10 nmol/mg), or (C, D) Av-MPG H (5 mg/mL) NPs for 24 hr. Figures B and D show magnification of similar regions as A and C, respectively. Cells were stained with Hoechst (blue) for the nucleus, LysoTracker® Red (red) for lysosomes, and C6 NPs (green). Panels (A,C) show cells at 20x magnification and (B,D) show cells at 40x magnification. Scale bars represent 50 and 25  $\mu$ m respectively, for the left and right panels.

**Figure 9.** Colocalization of DSPE-MPG, Av-MPG, and unmodified NPs with intracellular protein markers after 24 hr. Percent of NPs colocalized in subcompartments, relative to total NPs. Error bars represent standard deviation.

**Table 1.** Theoretical versus actual surface coverage density of Av-MPG and DSPE-MPG NPs.

| Sample       | Theoretical Coverage (nmol/mg) | Actual (nmol/mg) | % Incorporation | # Molecules/NP |
|--------------|--------------------------------|------------------|-----------------|----------------|
| Av-MPG L     | 0.14                           | 0.12             | 84%             | 158            |
| Av-MPG H     | 0.72                           | 0.72             | 100%            | 944            |
| DSPE-MPG 0.5 | 0.5                            | 0.45             | 90%             | 585            |
| DSPE-MPG 2   | 2                              | 1.79             | 90%             | 2321           |
| DSPE-MPG 5   | 5                              | 2.71             | 54%             | 3514           |
| DSPE-MPG 10  | 10                             | 4.09             | 41%             | 5308           |

## SUPPLEMENTARY DATA

### Supplemental Figure

**S1.** Matrix assisted laser desorption/ionization (MALDI) verification of DSPE-PEG-maleimide conjugation to MPG.

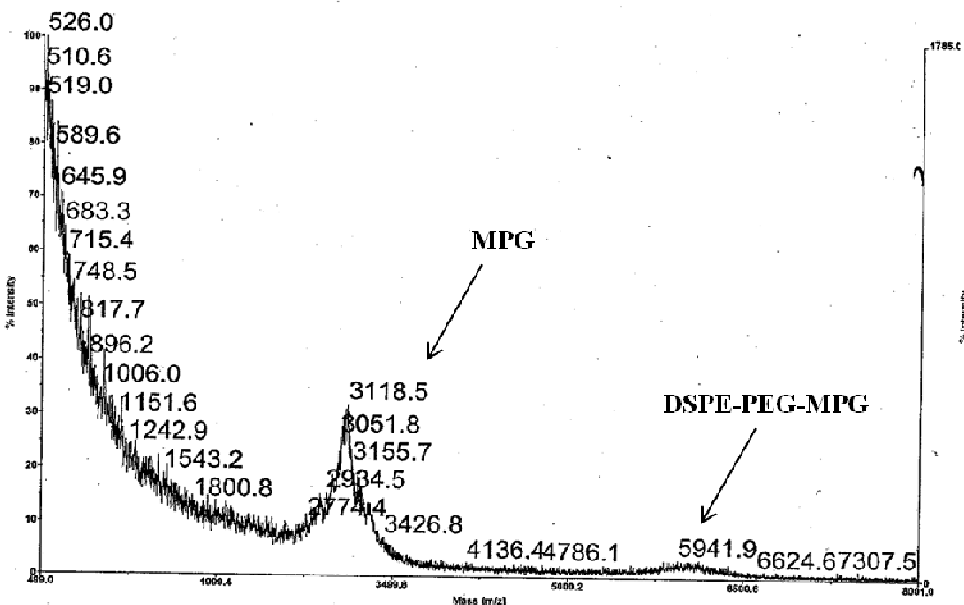

Supplement: NIHMS741505-supplement-01.pdf [file NIHMS741505-supplement-01.pdf]
